# Supplementary material for: Ergosterol content specifies targeting of tail-anchored proteins to mitochondrial outer membranes
Source: PubMed Central journal article supplement — Mol Biol Cell. 2012 Oct 15;23(20):3927–35. doi: 10.1091/mbc.E11-12-0994 (PMC3469509; doi:10.1091/mbc.e11-12-0994), 2012-10-15
Supplement: supp_E11-12-0994_CombinedSupMats.pdf [file supp_E11-12-0994_CombinedSupMats.pdf]

## SUPPLEMENTARY INFORMATION

**Table of yeast strains** (all yeast were MATa S288C-BY4741/2 background except where indicated)

| Strain Name                     | # in MS database | Markers                                                                                                                    | Remarks                                                                                                                                                                | Phenotype                          |
|---------------------------------|------------------|----------------------------------------------------------------------------------------------------------------------------|------------------------------------------------------------------------------------------------------------------------------------------------------------------------|------------------------------------|
| GFP-GEM1                        | 939              | <i>his3Δ1 leu2Δ0 met15Δ0 ura3Δ0</i><br><i>HIS::GAL1p-GFP-GEM1</i>                                                          | GEM1 was endogenously tagged at its N-terminus with GFP and the promoter was replaced to the <i>GAL1</i> promoter.                                                     | Gem1 is localized to mitochondria. |
| GFP-GEM1 <i>Δspf1</i>           | 940              | <i>his3Δ1 leu2Δ0 met15Δ0 ura3Δ0</i><br><i>HIS::GAL1p-GFP-GEM1 Δspf1::Kan<sup>r</sup></i>                                   | GEM1 was endogenously tagged at its N-terminus with GFP and the promoter was replaced to the <i>GAL1</i> promoter. on a <i>Δspf1</i> strain from the deletion library. | Gem1 is mis-localized to the ER.   |
| GFP-GEM1 <i>Δget3</i>           | 944              | <i>his3Δ1 leu2Δ0 met15Δ0 ura3Δ0</i><br><i>HIS::GAL1p-GFP-GEM1 Δget3::URA</i>                                               | GET3 was deleted from the GFP-GEM1 strain.                                                                                                                             | Gem1 is localized to mitochondria. |
| GFP-GEM1 <i>Δspf1 Δget3</i>     | 945              | <i>his3Δ1 leu2Δ0 met15Δ0 ura3Δ0</i><br><i>HIS::GAL1p-GFP-GEM1 Δspf1::Kan<sup>r</sup> Δget3::URA</i>                        | GET3 was deleted from the GFP-GEM1 <i>Δspf1</i> Strain.                                                                                                                | Gem1 is mis-localized to the ER.   |
| SGA YMS 140<br>GFP-GEM1<br>MATα | 140              | <i>his3Δ1 leu2Δ0 lys2+ met15Δ0 ura3Δ0</i><br><i>can1Δ::MFA1pr-LEU2 lyp1Δ cyh2</i><br><i>HIS::GAL1p-GFP-GEM1</i>            | The query strain for the SGA analysis.                                                                                                                                 | Gem1 is localized to mitochondria. |
| Deletion library                |                  | <i>his3Δ1 leu2Δ0 met15Δ0 ura3Δ0</i>                                                                                        | The entire yeast knock-out collection (Giaever et al., 2002).                                                                                                          |                                    |
| DAmP library                    |                  | <i>his3Δ1 leu2Δ0 met15Δ0 ura3Δ0</i>                                                                                        | The entire DAmP library (Breslow et al., 2008; Schuldiner et al., 2005).                                                                                               |                                    |
| pGal-Spf1-GFP                   | 994              | <i>his3Δ1 leu2Δ0 met15Δ0 ura3Δ0</i><br><i>can1Δ::STE2pr-spHIS5 lyp1Δ::STE3pr-LEU2</i><br><i>Kanr::Galpr-SPF1-GFP::Natr</i> | The endogenous promoter of SPF1 was replaced with an inducible one (GALp). In addition, SPF1 was C-terminally tagged with GFP.                                         | See figure 1D.                     |
| CSY 605                         | 1130             | <i>KanR</i>                                                                                                                | Rnt1p consensus elements were added to <i>ERG9</i> . See (abiskin & Smolke, 2011) for a detailed characterization of the strain.                                       | Fis1 is localized to mitochondria. |
| CSY 692                         | 1136             | <i>KanR</i>                                                                                                                | Rnt1p consensus elements were added to <i>ERG9</i> . See (abiskin & Smolke, 2011) for a detailed characterization of the strain.                                       | Fis1 is localized to mitochondria. |

|                          |      |                                                                                         |                                                                                                                                  |                                                                               |
|--------------------------|------|-----------------------------------------------------------------------------------------|----------------------------------------------------------------------------------------------------------------------------------|-------------------------------------------------------------------------------|
| CSY 693                  | 1137 | <i>KanR</i>                                                                             | Rnt1p consensus elements were added to <i>ERG9</i> . See (abiskin & Smolke, 2011) for a detailed characterization of the strain. | Fis1 is localized to ER.                                                      |
| TEToff-ERG10<br>GFP-GEM1 | 1326 | <i>his3Δ1 leu2Δ0 met15Δ0 ura3Δ0::CMV-tTA-URA3 KanR-tetO7-TATA::ERG10 His3-GFP::GEM1</i> | GEM1 was N terminally tagged with GFP on the background of a TEToff-ERG10 strain.                                                | When grown in the presence of doxy for 11 hours, Gem1 is localized to the ER. |
| W303a                    |      | <i>ade2-1; can1-100; his3-11; leu2 3_112; trp1Δ2; ura3-52;</i>                          | wildtype strain                                                                                                                  |                                                                               |
| $\Delta$ <i>spf1</i>     |      | <i>ade2-1; can1-100; his3-11; leu2 3_112; trp1Δ2; ura3-52; SPF1::HIS3</i>               | ORF of <i>spf1</i> was deleted from wildtype strain by replacement with a HIS-cassette                                           | Gem1 and Fis1 are mis-localized to ER                                         |

## Table of primers

| Primer Name      | Description                                                                                                 | Sequence                                                                 | Product size (bps) | Template           |
|------------------|-------------------------------------------------------------------------------------------------------------|--------------------------------------------------------------------------|--------------------|--------------------|
| spf1-wtchk-f     | Forward primer for check for <i>SPF1</i> deletion.                                                          | AGAGCACGCTGTTGCGCC<br>AT                                                 | 290                | strain genome      |
| spf1-wtchk-r     | Reverse primer to check for <i>SPF1</i> deletion.                                                           | AATGCGCTCTCCTCGGC<br>GG                                                  | 290                | strain genome      |
| get3-wtchk-f     | Forward primer to check for <i>GET3</i> deletion.                                                           | ACGCCAGAAAGGTGACA<br>GGCA                                                | 300                | strain genome      |
| get3-wtchk-r     | Reverse primer to check for <i>GET3</i> deletion.                                                           | TGTGGCCAGTTGGAGCAG<br>TGT                                                | 300                | strain genome      |
| KO-YDL100C-Trp-5 | Forward primer to delete <i>GET3'</i> ORF.                                                                  | ATGGATTTAACCGTGAA<br>CCTAATTTGCACTCTTTA<br>ATTACACAGGAAACAGC<br>TATGACC  | 1600               | Plasmid: pKL-URA   |
| KO-YDL100C-Trp-3 | Reverse primer to delete <i>GET3'</i> ORF.                                                                  | CTATTCCTTATCTTCTAAC<br>TCATAAATGACTTTGCCA<br>TCAGTTGTAAAACGACGG<br>CCAGT | 1600               | Plasmid: pKL-URA   |
| Gem1-NGFP-F      | Forward primer for adding N-terminal GFP tag based as well as swapping promoters to GAL1p for <i>Gem1</i> . | AAATAGCGGACTTCTAAA<br>TACTAATGTGTTGAACAA<br>CACAGAATTCGAGCTCGT<br>TTAAAC | 3000               | pFA6-HIS-GAL1p-GFP |

|                    |                                                                                                           |                                                                                                   |      |                         |
|--------------------|-----------------------------------------------------------------------------------------------------------|---------------------------------------------------------------------------------------------------|------|-------------------------|
| Gem1-NGFP-R        | Reverse primer for adding N-terminal GFP tag based as well as swapping promoters to GAL1p for <i>Gem1</i> | CTTCATCACCGCAAATAA<br>CTACCCGAATCGTTTCTT<br>TAGTTTTGTATAGTTCAT<br>CCATGC                          | 3000 | pFA6a-GFP(S65T)-HIS3MX6 |
| R5-Rev             | Forward primer to check N-terminal GFP fusion into <i>Gem1</i> .                                          | GCATGGATGAACTATACA<br>AA                                                                          | 611  | strain genome           |
| Gem1-NGFPchk-R     | Reverse primer to check N-terminal GFP fusion into <i>GEM1</i>                                            | TTCACCTACCATGGCATC<br>AA                                                                          | 611  | strain genome           |
| 5-SPF1-KO          | Forward Primer to delete <i>Spf1</i> ORF in W303 $\alpha$                                                 | GAC ATA GTT GAC ATA<br>TCA GAC CTA CAG AAA<br>CAT AGG AAT CGG TAA<br>CGT ACG CTG CAG GTC<br>GAC   | 1590 | pFA6a-HIS3MX6           |
| 3-SPF1-KO          | Reverse Primer to delete <i>Spf1</i> ORF in W303 $\alpha$                                                 | ATA TAA GTA TAT AAA<br>TAC AAA AAG GGG TAC<br>TAC ATA AAA GAT TTA<br>ATC GAT GAA TTC GAG<br>CTC G | 1590 | pFA6a-HIS3MX6           |
| 5-SPF1-KO-K        | Forward Primer to check for deletion of <i>Spf1</i> in W303 $\alpha$ ; negative control                   | CCC TGC ATC TTG CGC<br>TGC C                                                                      | 927  | strain genome           |
| 3-SPF1-KO-K        | Reverse Primer to check for deletion of <i>Spf1</i> in W303 $\alpha$                                      | CCC GAA GCT ATT ATA<br>ATT TTC GTA TAC                                                            | 927  | strain genome           |
| HisC               | Forward Primer to check for deletion of <i>Spf1</i> in W303 $\alpha$ ; positive control                   | CTT GGT TTC ATT TGT<br>AAT ACG CT                                                                 | 400  | strain genome           |
| SPF1-mut1-G1459A-F | Forward Primer to introduce the first mutation that creates the ATPase dead-form of <i>SPF1</i>           | GAATTGATGTTTGTGTT<br>TCAATAAAACTGGTACTT<br>TGACCG                                                 | ~    | pSM2-SPF1-HA            |
| SPF1-mut1-G1459A-R | Reverse Primer to introduce the first mutation that creates the ATPase dead-form of <i>SPF1</i>           | CGGTCAAAGTACCAGTTT<br>TATTGAAACAACAAACAT<br>CAATTC                                                | ~    | pSM2-SPF1-HA            |
| SPF1-mut2-G2443A-F | Forward Primer to introduce the second mutation that creates the ATPase dead-form of <i>SPF1</i>          | GGGATATCAAACCTTAAT<br>GTGCAGTGATGGTACTAA<br>TGATGTTGGTGCTT                                        | ~    | pSM2-SPF1-HA            |
| SPF1-mut2-G2443A-R | Reverse Primer to introduce the second mutation that creates the ATPase dead-form of <i>SPF1</i>          | AAGCACCAACATCATTAG<br>TACCATCACTGCACATTA<br>AAGTTTGATATCCC                                        | ~    | pSM2-SPF1-HA            |

## Table of plasmids

| Plasmid Name             | # in MS database | Description                                                                                                                                                                                                                                                                                                                                                                | Reference                                                                                                               |
|--------------------------|------------------|----------------------------------------------------------------------------------------------------------------------------------------------------------------------------------------------------------------------------------------------------------------------------------------------------------------------------------------------------------------------------|-------------------------------------------------------------------------------------------------------------------------|
| pKL-URA                  | 70               | Plasmid for knocking out genes using homologous recombination. Has the <i>K. Lactis</i> URA gene.                                                                                                                                                                                                                                                                          | (Kitada et al., 1995)                                                                                                   |
| pYM-N23: Nat::GAL1p      | 274              | A derivative of the pYM homologous recombination plasmids family. Used to replace the native promoter with the GAL1 promoter. Integration confers nourseothricin (NAT) resistance.                                                                                                                                                                                         | (Janke et al., 2004)                                                                                                    |
| C/A URA Cherry-FIS1      | 122              | Cen/Ars plasmid expressing mCherry-FIS1. (URA+)                                                                                                                                                                                                                                                                                                                            | (Schuldiner et al., 2008)                                                                                               |
| C/A URA Cherry-SBH2      | 124              | Cen/Ars plasmid expressing mCherry-Sbh2. (URA+).                                                                                                                                                                                                                                                                                                                           | (Schuldiner et al., 2008)                                                                                               |
| GFP-SCS2                 | 144              | Cen/Ars plasmid expressing GFP- Scs2 from a Pho5 promoter. (URA+)                                                                                                                                                                                                                                                                                                          | (Loewen and Levine, 2005)                                                                                               |
| GFP-SED5                 | 113              | 2 $\mu$ plasmid driving expression of GFP-Sed5. (LEU+)                                                                                                                                                                                                                                                                                                                     | (Schuldiner et al., 2008)                                                                                               |
| pFA6-HIS-GAL1p-GFP       | 132              | A plasmid for making N terminal GFP fusion proteins by PCR together with exchanging the endogenous promoter with the <i>GAL1</i> promoter.                                                                                                                                                                                                                                 | (Longtine et al., 1998)                                                                                                 |
| pBS35-mCherry-hygromycin | 234              | A plasmid for making C terminal mCherry fusion proteins by PCR mediated homologous recombination. Confers resistance to Hygromycin.                                                                                                                                                                                                                                        | <a href="http://depts.washington.edu/yeastrc/pages/pBS35.html">http://depts.washington.edu/yeastrc/pages/pBS35.html</a> |
| pCRZ1-p                  | 84               | 2 $\mu$ plasmid for expressing the constitutively activated form of the Crz1 transcription factor (URA+).                                                                                                                                                                                                                                                                  | (Edlind et al., 2002).                                                                                                  |
| MTS-mCherry              | 167              | Cen/Ars plasmid expressing Mitochondria localized cherry.                                                                                                                                                                                                                                                                                                                  | kind gift from Jodi Nunnari                                                                                             |
| BFGIII-GET3-OE           | 105              | Plasmid for overexpressing GET3 with 3 N-terminal HA-Tags under control of ADH1 promotor in yeast                                                                                                                                                                                                                                                                          | kind gift from Blanche Schwappach                                                                                       |
| pSM2-SPF1-HA             | 287              | Cen/Ars plasmid expressing <i>SPF1</i> gene. This plasmid rescues the mislocalization of mCherry-Fis1 to the ER back to mitochondria on the background of $\Delta$ <i>spf1</i> cells.                                                                                                                                                                                      |                                                                                                                         |
| pSM2-SPF1-HA mut1 G1459A | 381              | The first mutation introduced to SPF1 on plasmid 287 is G1459A. This mutation changes the first letter of codon # 487 from GAT (Asp) to AAT (Asn). In Suzuki et al, 2001, this mutation was shown to cancel the rescue of a <i>spf1</i> plasmid in respect to SMKT resistance phenotype. This plasmid fails to rescue the mislocalization of mCherry-Fis1 to the ER on the |                                                                                                                         |

|                             |     |                                                                                                                                                                                                                                                                                                                                                                                                                                                             |  |
|-----------------------------|-----|-------------------------------------------------------------------------------------------------------------------------------------------------------------------------------------------------------------------------------------------------------------------------------------------------------------------------------------------------------------------------------------------------------------------------------------------------------------|--|
|                             |     | background of <i>Δspf1</i> cells.                                                                                                                                                                                                                                                                                                                                                                                                                           |  |
| pSM2-SPF1-HA mut2<br>G2443A | 383 | The second mutation introduced to SPF1 on plasmid 287 is G2443A. This mutation changes the first letter of codon # 815 from GGT (Gly) to AGT (Ser). In Suzuki et al, 1999, this mutation was suggested to be involved in ATP binding and was shown to eliminate the SMKT resistance of yeast, which implies a loss of function of Spf1. This plasmid fails to rescue the mislocalization of mCherry-Fis1 to the ER on the background of <i>Δspf1</i> cells. |  |

## Supplementary Figures Legends

Krumpe *et al*, Supplementary Figure 1

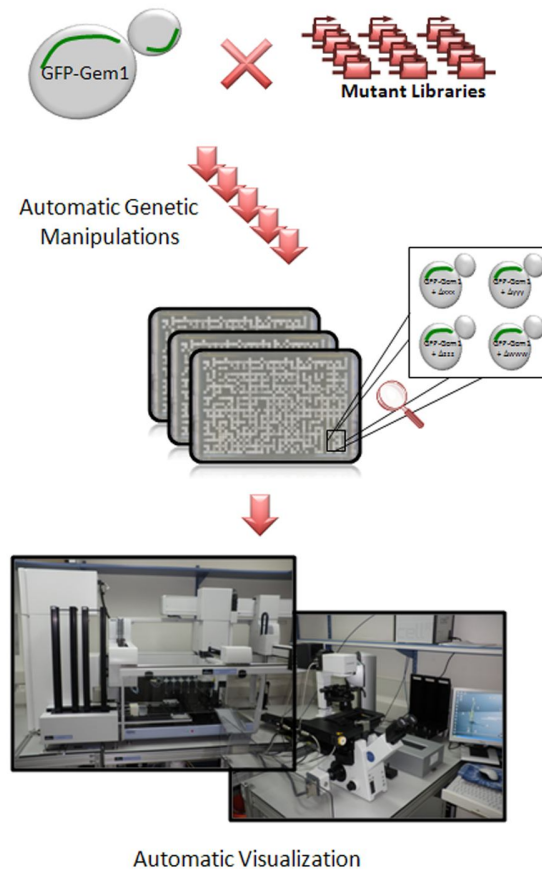

**Figure 1: SGA methodology.** GFP-Gem1 as a marker for mitochondrial TA protein insertion as it localizes correctly to mitochondrial membranes. To visualize GFP-Gem1 on the background of mutations in all yeast genes we mated a strain expressing GFP-Gem1 into a library of all mutations. Following selection of diploids and sporulation we could select only the haploid cells expressing both the marker and the mutation.

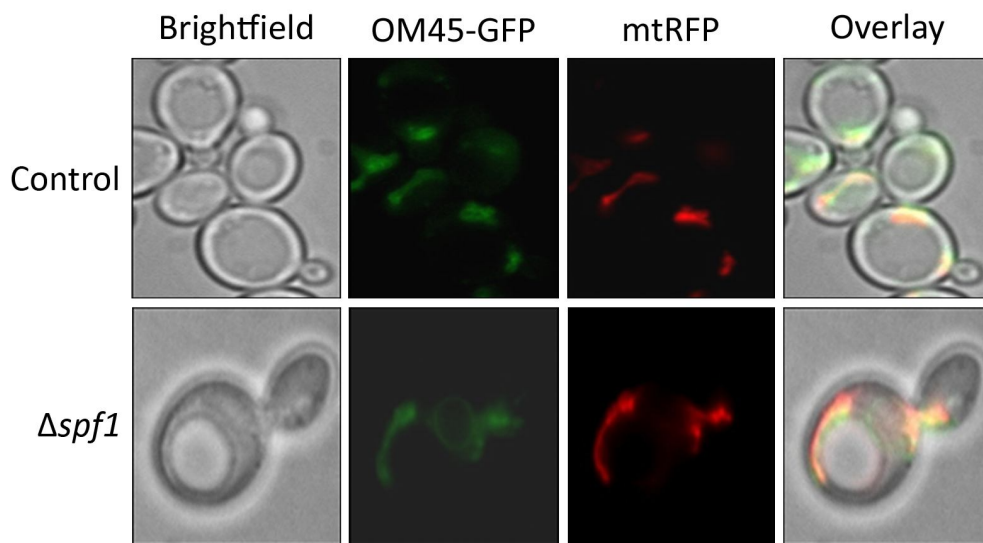

**Figure 2: Om45 is partially mislocalized to the ER in  $\Delta spf1$  cells.** Plasmids encoding GFP-Om45 and MTS-mCherry were transformed into control and  $\Delta spf1$  cells. Transformed cells were grown at 30°C to mid-log phase and analyzed by fluorescence microscopy.

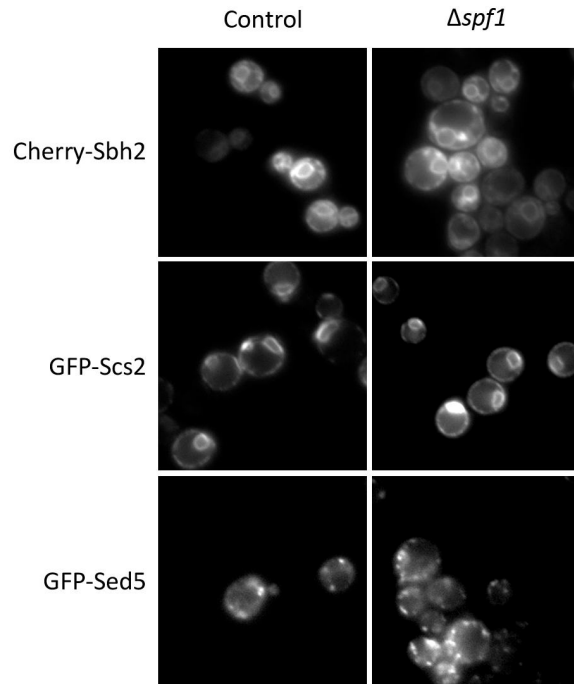

**Figure 3: Secretory pathway TA proteins are not affected in  $\Delta spf1$  cells. A.** Sbh2, Scs2 (ER TA proteins) and Sed5 (Golgi TA protein) are correctly localized on  $\Delta spf1$  background (X60 lens).



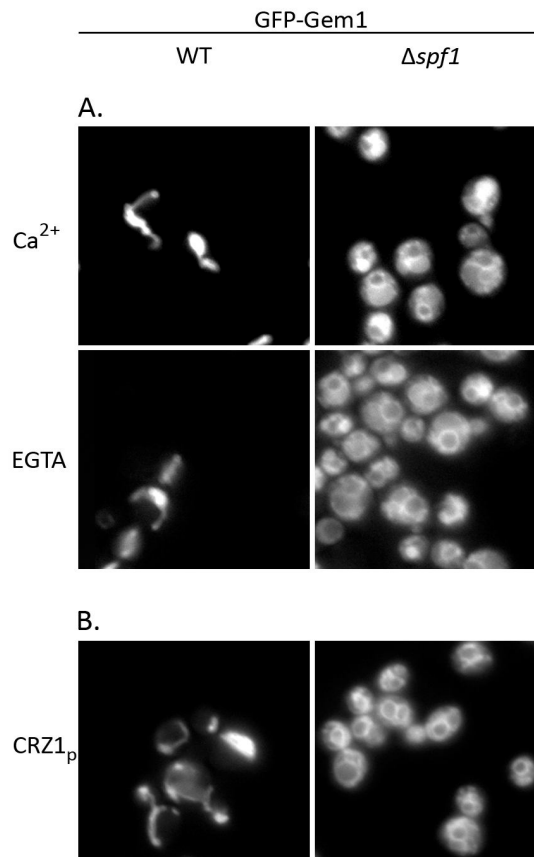

**Figure 4: The mislocalization of MOM TA proteins on  $\Delta spf1$  background cannot be explained by activation of the Calcium response:****A.** Neither Ca<sup>2+</sup> nor EGTA affected the mislocalization of GFP-Gem1 on  $\Delta spf1$  background nor phenocopied it in control cells. Control and  $\Delta spf1$  cells were grown in the presence of either 4mM Ca<sup>2+</sup> or 1mM EGTA and visualized using a X60 lens. **B.** Activation of the calcium response does not modulate MOM TA protein localization. A plasmid expressing a constitutively-phosphorylated Crz1 (a constitutively activated form of the calcineurin pathway transcription factor) was transformed into both control and  $\Delta spf1$  cells and cells were visualized in mid log (X60 lens).
